# Supplementary material for: Enzyme Bioprospection of Marine-Derived Actinobacteria from the Chilean Coast and New Insight in the Mechanism of Keratin Degradation in Streptomyces sp. G11C
Source: MDPI journal article supplement (doi:10.3390/md18110537), 2020-10-28
Supplement: s1 [file s1]

Article

# Enzyme bioprospection of marine-derived Actinobacteria from the Chilean coast and new insight in the mechanism of keratin degradation in *Streptomyces* sp. G11C

Valentina González <sup>1</sup>, María José Vargas-Straube<sup>1</sup>, Walter O. Beys-da-Silva<sup>2</sup>, Lucélia Santi<sup>2</sup>, Pedro Valencia<sup>3</sup>, Fabrizio Beltrametti<sup>4</sup> and Beatriz Cámara<sup>1\*</sup>

## Supplemental Figures

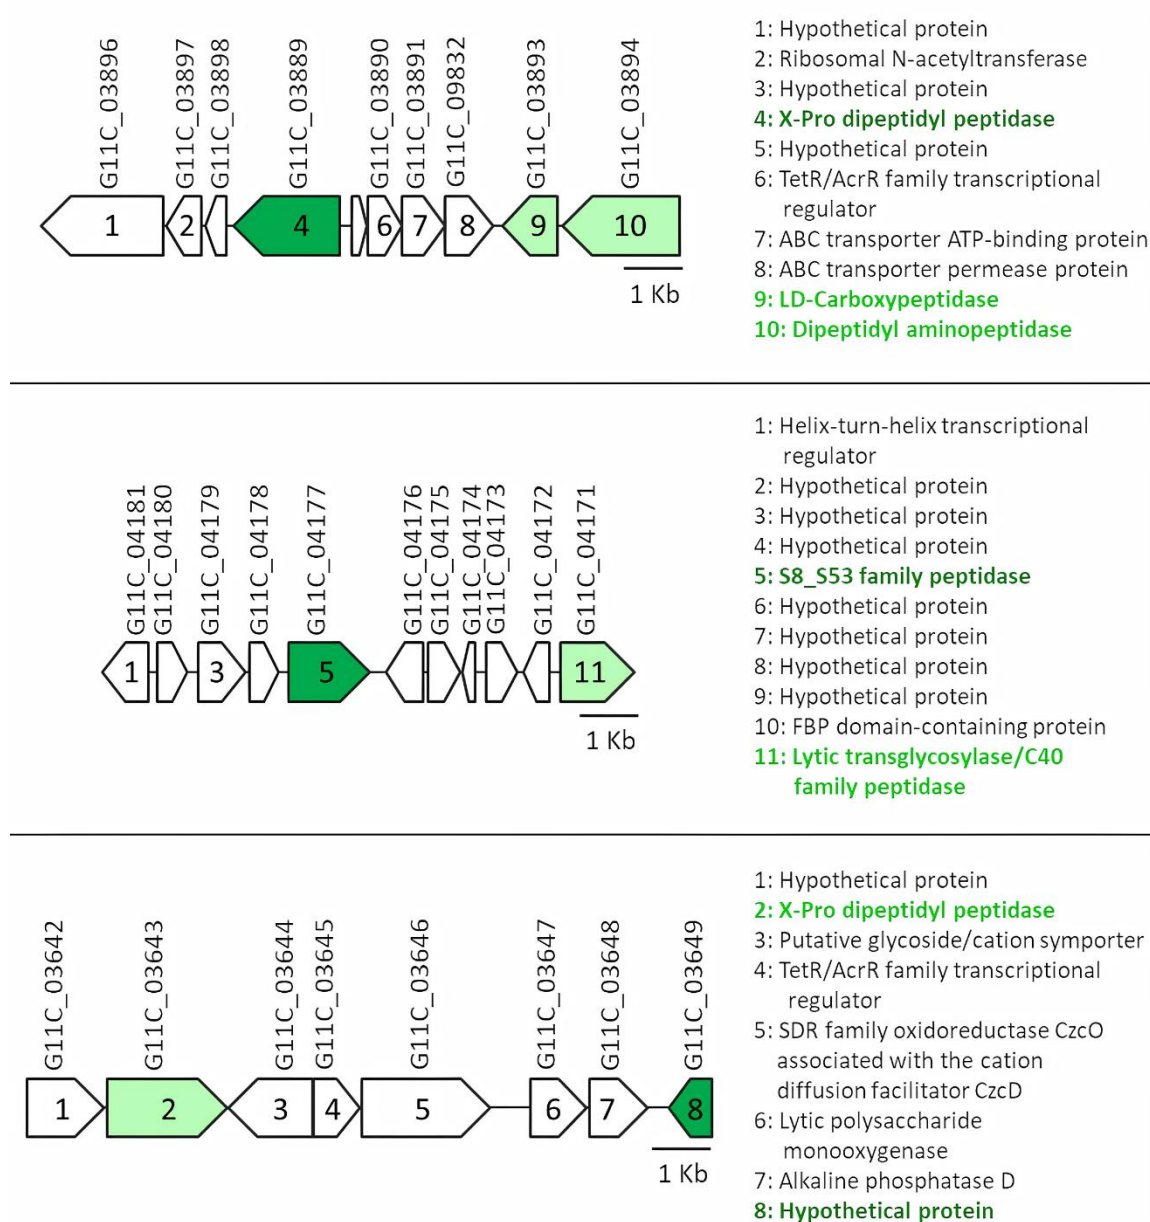

**Figure S1.** Genetic contexts of proteases identified in the secretome, close to other secreted proteases. The genetic contexts for the X-Pro dipeptidyl peptidase G11C\_03889, the S8\_S53 family peptidase G11C\_04177 and the hypothetical protein G11C\_03949 are shown.

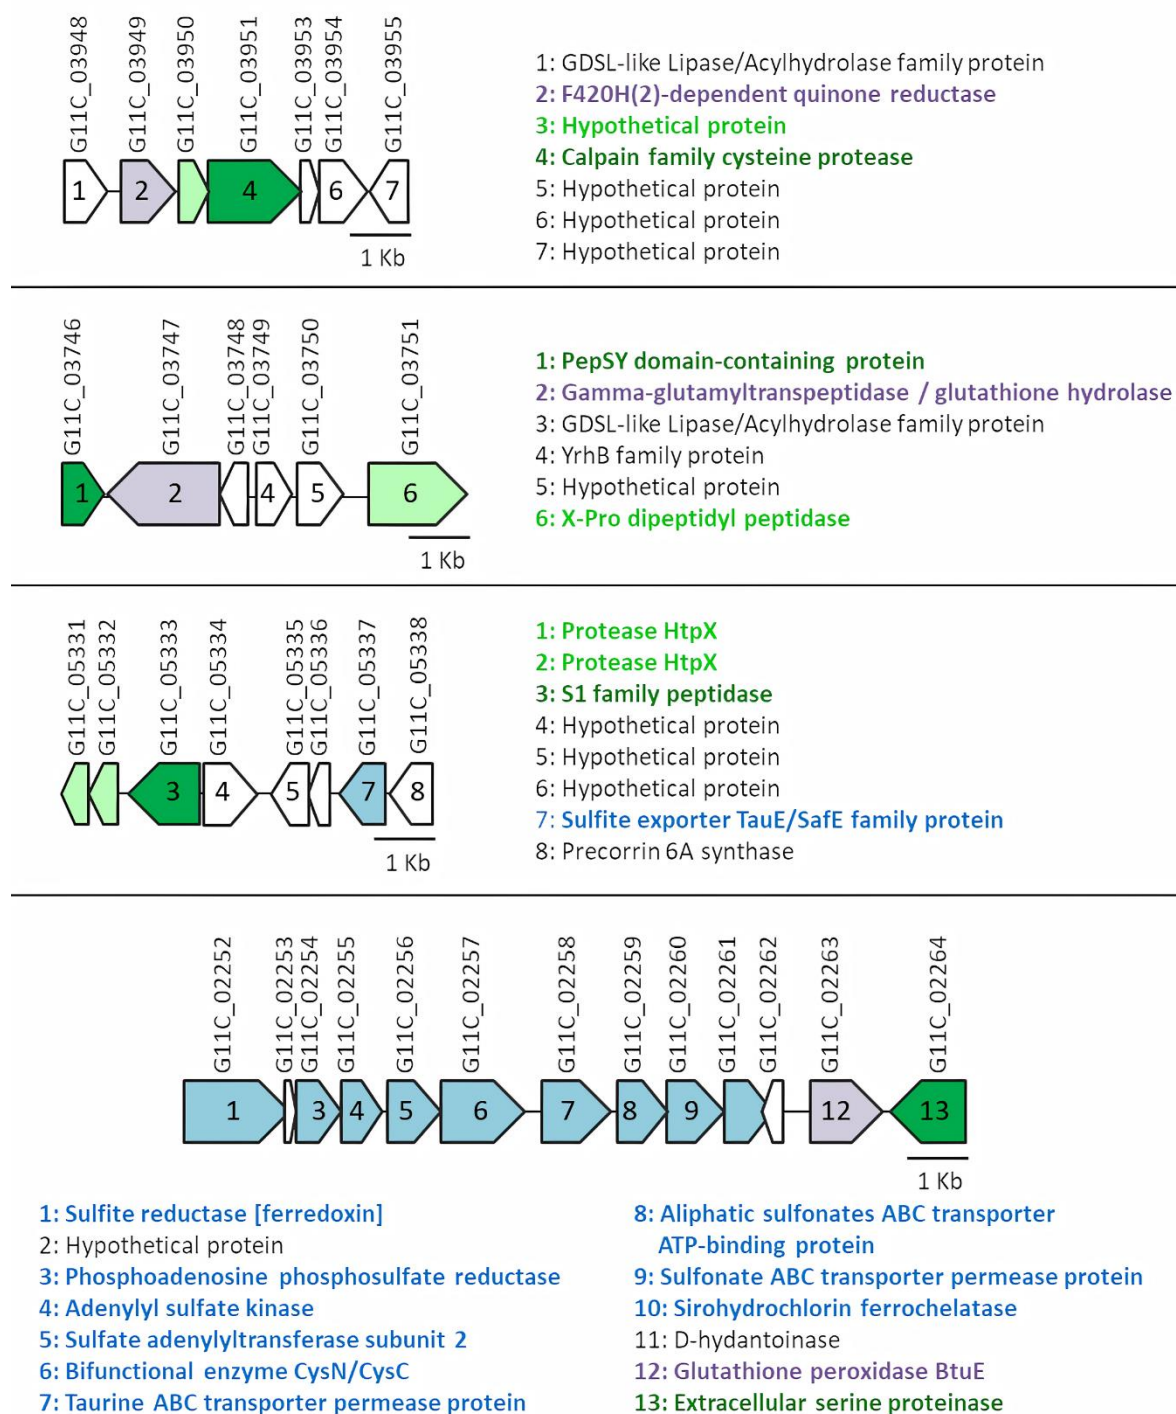

**Figure S2.** Genetic contexts of proteases identified in the secretome, close to genes encoding oxidoreductases and genes related to sulfite metabolism. The genetic contexts for the Calpain family cysteine protease G11C\_03951, the PepSY domain-containing protein G11C\_03746, the S1 family peptidase G11C\_05333, and the extracellular serine proteinase G11C\_02264 are shown.
